# Supplementary material for: Low EGFR/MET ratio is associated with resistance to EGFR inhibitors in non-small cell lung cancer
Source: PubMed Central journal article supplement (PMC4741578; doi:10.18632/oncotarget.5131), 2015-09-03
Supplement: oncotarget-06-30929-s001.pdf [file oncotarget-06-30929-s001.pdf]

## SUPPLEMENTARY FIGURES AND TABLES

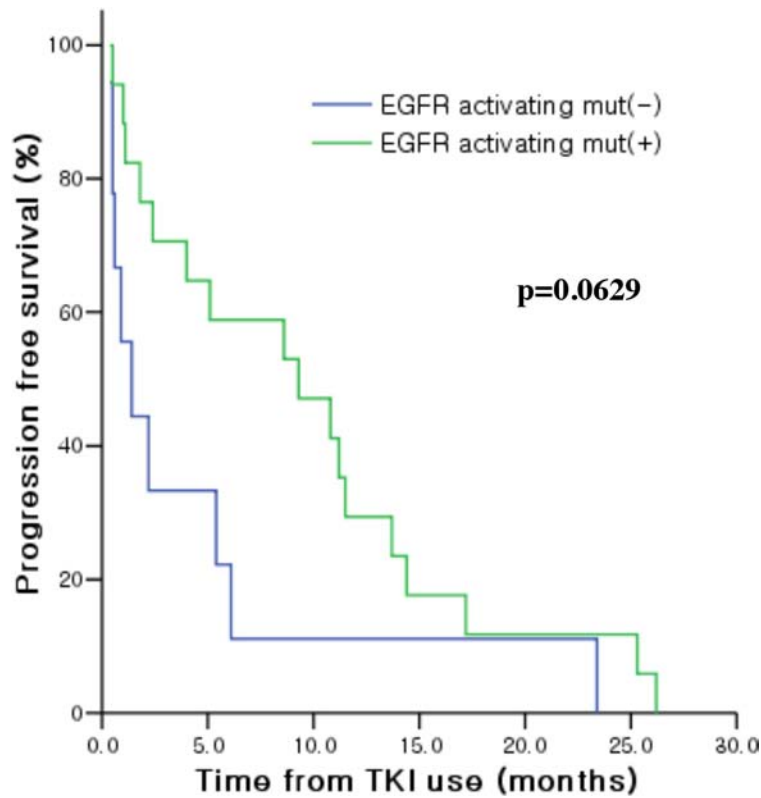

**Supplementary Figure S1: Kaplan-Meier PFS analysis according to *EGFR* mutation status in NSCLC patients treated with EGFR TKIs.** Out of an initial cohort of 34 NSCLC patients, 26 patients had evaluable PFS data and *EGFR* mutation information. The *EGFR* wild-type or non-activating mutation group ( $n = 9$ ) had a median PFS of 1.4 months compared to 9.3 months for the *EGFR*-activating mutation positive group ( $n = 17$ ). The PFS difference observed between the two groups did not reach statistical significance.



**Supplementary Table S1: Multiplexed RTK profile in NSCLC determined by CEER™**

| Patient Number | Sex | EGFR   | MET          | HER2    | HER3   | Patient Number | Sex | EGFR   | MET          | HER2    | HER3   |
|----------------|-----|--------|--------------|---------|--------|----------------|-----|--------|--------------|---------|--------|
| 006-002        | F   | 59.6   | 349.96       | 1108.77 | —      | 006-026        | F   | 107.46 | 546.47       | 1171.7  | 139.51 |
| 006-003        | M   | 74.35  | 174.07       | 257.23  | —      | 006-027        | M   | —      | —            | —       | —      |
| 006-004        | F   | 60.61  | 180.1        | 193.4   | —      | 006-028        | F   | 55.79  | 1432.94      | 1229.93 | 37.01  |
| 006-005        | M   | 22.53  | 301.46       | 173.32  | —      | 006-029        | F   | 193.33 | 691.55       | 1781.91 | 27.67  |
| 006-006        | F   | 171.33 | 1531.44      | 3115.19 | 306.21 | 006-030        | F   | 0.97   | —*           | —       | —      |
| 006-008        | M   | 155.5  | 1234.39      | 4135.19 | 211.55 | 006-031        | F   | 100.44 | 880.02       | 1062.08 | —      |
| 006-009        | M   | 22.08  | 36.38        | 209.8   | —      | 006-032        | M   | 95.4   | H<br>(>2000) | 1215.65 | 80.9   |
| 006-010        | M   | 170.91 | H<br>(>2000) | 1616.76 | 65.54  | 006-034        | F   | —      | —            | —       | —      |
| 006-012        | F   | 2.01   | —*           | —       | —      | 006-035        | F   | —      | —            | —       | —      |
| 006-013        | F   | 65.51  | 338.6        | 436.81  | —      | 006-037        | F   | 46.07  | 799.87       | 537.07  | —      |
| 006-014        | F   | 51.19  | 473.64       | 336.86  | —      | 006-038        | M   | 76.58  | H<br>(>2000) | 852.68  | —      |
| 006-017        | M   | 109.36 | 304.62       | 313.77  | —      | 006-039        | F   | 46.35  | 1042.02      | 520.72  | —      |
| 006-018        | F   | 0.53   | —*           | —       | —      | 006-040        | M   | 67     | 197.25       | 298.4   | —      |
| 006-019        | M   | —      | —            | —       | —      | 006-041        | F   | 7.69   | 27.59        | 106.45  | —      |
| 006-021        | F   | 0.46   | —*           | —       | —      | 006-042        | M   | —      | —            | —       | —      |
| 006-023        | M   | 74.64  | 285.44       | 2634.46 | —      | 006-043        | M   | 2.28   | 8.28         | 70.93   | —      |
| 006-025        | F   | 64.59  | 319.32       | 641.69  | —      | 006-044        | M   | 108.43 | 1246.51      | 571.35  | —      |

RTK expression was quantified in specimens collected from 34 patients treated with TKIs. RTK values shown are in Computed Unit (CU). RTKs are expressed in 29 out of 34 cases (85.3%).

‘—’ denotes an undetectable signal; ‘H’ denotes a signal above the upper limit of quantitation of the assay, in the case of MET H is > 2000 CU;

‘—\*’ indicates the lower limit of detection of 2.5 CU for MET was used to determine EGFR/MET ratio.

**Supplementary Table S2: HER3 expression in NSCLC specimens**

| Patient Number | EGFR activating mutation | TKIs      | PFS with TKI | Best response to TKI | HER3   | Patient Number | EGFR activating mutation | TKIs      | PFS with TKI | Best response to TKI | HER3   |
|----------------|--------------------------|-----------|--------------|----------------------|--------|----------------|--------------------------|-----------|--------------|----------------------|--------|
| 006-002        | Positive                 | Gefitinib | <b>26.2</b>  | PR                   | –      | 006-023        | Positive                 | Gefitinib | <b>17.2</b>  | PR                   | –      |
| 006-003        | Positive                 | Erlotinib | 1.1          | SD                   | –      | 006-025        | Positive                 | Erlotinib | <b>13.7</b>  | PR                   | –      |
| 006-004        | Negative                 | Gefitinib | <b>23.4</b>  | PR                   | –      | 006-026        | Positive                 | Gefitinib | 11.2         | PR                   | 139.51 |
| 006-005        | NA                       | Erlotinib | 0.2          | PD                   | –      | 006-029        | Positive                 | Gefitinib | 9.3          | PR                   | 27.67  |
| 006-006        | Negative                 | Gefitinib | 0.9          | PD                   | 306.21 | 006-030        | NA                       | Gefitinib | 2.1          | SD                   | –      |
| 006-008        | Negative                 | Erlotinib | 6.1          | PR                   | 211.55 | 006-031        | Positive                 | Erlotinib | 10.8         | PR                   | –      |
| 006-009        | NA                       | Gefitinib | 1.8          | PD                   | –      | 006-032        | Positive                 | Erlotinib | 0.5          | PD                   | 80.9   |
| 006-010        | NA                       | Gefitinib | 5.1          | PR                   | 65.54  | 006-037        | Positive                 | Gefitinib | 5.1          | PR                   | –      |
| 006-012        | Negative                 | Gefitinib | 5.4          | SD                   | –      | 006-039        | Negative                 | Gefitinib | 0.4          | SD                   | –      |
| 006-013        | Positive                 | Gefitinib | 8.6          | PR                   | –      | 006-040        | Positive                 | Erlotinib | <b>14.4</b>  | PR                   | –      |
| 006-014        | Negative                 | Gefitinib | 1.4          | PD                   | –      | 006-041        | Positive                 | Gefitinib | 2.4          | SD                   | –      |
| 006-017        | NA                       | Erlotinib | <b>27.1</b>  | PR                   | –      | 006-043        | Positive                 | Erlotinib | 11.5         | PR                   | –      |
| 006-018        | Negative                 | Gefitinib | 0.5          | PD                   | –      | 006-044        | Positive                 | Afatinib  | 1            | PD                   | –      |
| 006-021        | Positive                 | Gefitinib | <b>25.3</b>  | PR                   | –      |                |                          |           |              |                      |        |

Out of an initial cohort of 34 patients, 27 patients have evaluable progression free survival (PFS) data and an RTK profile. Among these, tumor HER3 expression was absent in 100% (7/7) patients with PFS  $\geq$  12 months (in bold), while 30% (6/20) patients with PFS < 12 months display tumor HER3 expression. HER3 values shown are in Computed Unit (CU). PFS: progression free survival in months; PR: partial response; SD: stable disease; PD: progressive disease; NA: not assessed.

**Supplementary Table S3: RTK profile analysis in NSCLC specimens taken from 5 patients at different time-points on EGFR TKI therapy**

| Patient ID | EGFR TKIs (Activating mutation) | T*  | EGFR        | HER2       | HER3    | MET          | IGF-1R    | PI3K       | pEGFR     | pHER2     | pHER3   | pMET    | pIGF-1R | pPI3K  | pSHC   |
|------------|---------------------------------|-----|-------------|------------|---------|--------------|-----------|------------|-----------|-----------|---------|---------|---------|--------|--------|
| 006-010    | Gefitinib (NA)                  | (1) | 170,909,166 | 80,838,004 | 655,412 | >100,000,000 | 1,037,498 | 5,608,644  | 5,621,454 | 1,063,121 | 198,166 | 35,392  | 31,895  | 48,930 | 54,022 |
|            |                                 | (3) | 162,387,169 | 42,678,731 | 834,451 | 93,919,132   | 996,841   | 10,267,832 | 2,680,397 | 241,876   | 69,079  | 128,244 | 28,234  | 20,306 | 18,221 |
| 006-012    | Gefitinib (Negative)            | (1) | 2,011,634   | L          | L       | L            | L         | 699,239    | L         | L         | L       | L       | L       | L      | L      |
|            |                                 | (3) | 1,006,310   | L          | L       | L            | L         | L          | L         | L         | L       | L       | L       | L      | L      |
| 006-013    | Gefitinib (Positive)            | (1) | 65,505,447  | 21,840,491 | L       | 16,930,088   | L         | 1,114,338  | L         | L         | L       | L       | L       | L      | L      |
|            |                                 | (2) | 51,695,871  | 8,434,599  | L       | 6,747,955    | L         | 619,891    | L         | L         | L       | L       | L       | 4,974  | L      |
| 006-014    | Gefitinib (Negative)            | (1) | 51,188,224  | 16,842,995 | L       | 23,681,755   | L         | 3,636,907  | L         | L         | L       | L       | L       | L      | L      |
|            |                                 | (2) | 51,725,694  | 15,787,747 | L       | 19,365,391   | L         | 1,150,462  | L         | L         | L       | L       | L       | 4,733  | L      |
|            |                                 | (3) | 36,419,314  | 13,797,670 | L       | 21,623,794   | L         | 1,517,533  | L         | L         | L       | L       | L       | L      | L      |
| 006-037    | Gefitinib (Positive)            | (1) | 46,072,968  | 26,853,672 | L       | 39,993,718   | L         | 1,301,773  | 11,708    | L         | L       | L       | L       | L      | L      |
|            |                                 | (3) | 3,137,553   | 1,448,861  | L       | 5,857,209    | L         | L          | L         | L         | L       | L       | L       | L      | L      |

\*The RTK profile of samples collected at different time-points throughout treatment was determined by CEER™. A comprehensive expression and phosphorylation (p) profile was observed in one clinical case (006-010). Corresponding immunoblot is shown in Figure 1. Measured CU values are converted into relative number of marker expression or activation.

T represents timing of tissue acquisition: (1) pre-treatment; (2) 4 weeks after onset of EGFR TKI treatment; (3) end of treatment

NA: not assessed; L: marker levels below limit of detection.
